# Supplementary material for: Cholesterol-mediated allosteric regulation of the mitochondrial translocator protein structure
Source: PubMed Central journal article supplement (PMC5379104; doi:10.1038/ncomms14893), 2017-03-30
Supplement: ncomms14893-s1.pdf [file ncomms14893-s1.pdf]

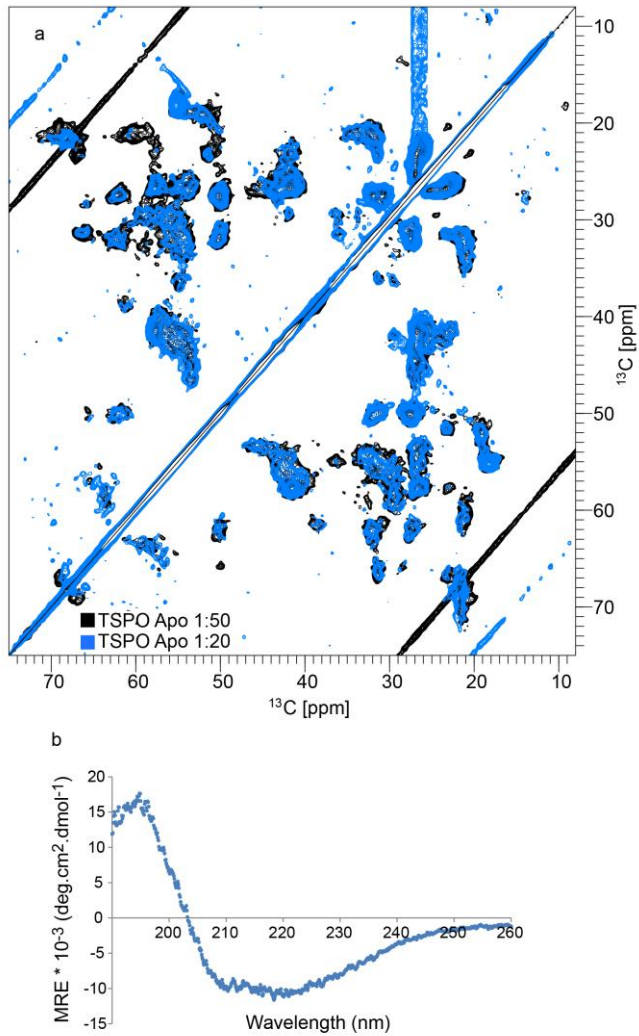

**Supplementary Figure 1 | Membrane-embedded mTSPO in the absence of DAA1106.** (a) Solid-state  $^{13}\text{C}$ - $^{13}\text{C}$  PDS spectra of apo mTSPO reconstituted into DMPC liposomes. Protein-to-lipid molar ratios of 1:20 (blue; recorded at 800 MHz) and 1:50 (black; recorded at 950 MHz) are shown. (b) Far-UV circular dichroism spectrum of the 1:20 sample in (a).

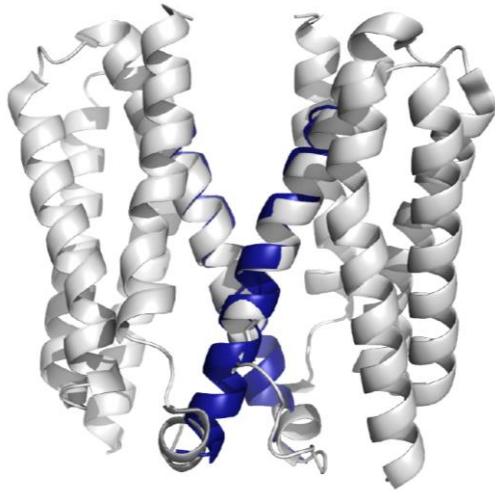

**Supplementary Figure 2** | The GxxxG motif in bacterial TspO. Superposition of the dimeric crystal structure of TspO from *Bacillus cereus* (grey; PDB id: 4RYJ) with the canonical GxxxG inter-helix arrangement of glycoporphin A (blue; PDB id: 5EH4). The relative orientation between the two helices, which contain the GxxxG motif and thereby form the dimerization interface, is highly similar.

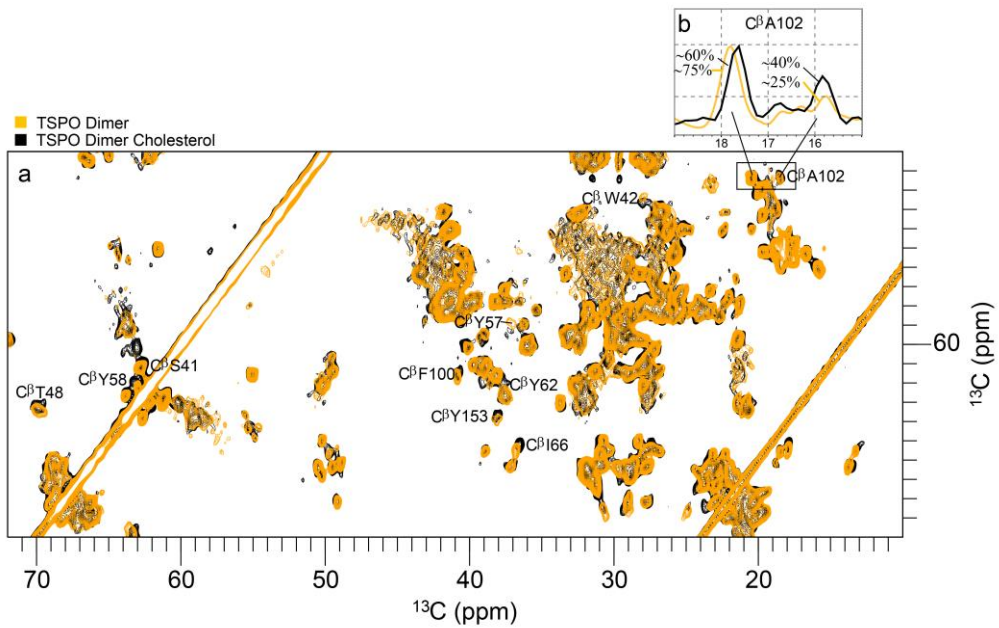

**Supplementary Figure 3 | Cholesterol causes allosteric structural changes and promotes dissociation of the mTSPO dimer.** (a) Superposition of 2D  $^{13}\text{C}$ - $^{13}\text{C}$  PDSD spectra of mTSPO (bound to DAA1106) in the absence (gold) and presence (black) of a 10-fold excess of cholesterol. The mixing time was 20 ms. Residues, which underwent chemical shift changes, are labelled. (b) 1D traces for  $\text{C}^\beta\text{A102}$  taken from PDSD spectra in the absence (gold) and presence (black) of cholesterol.

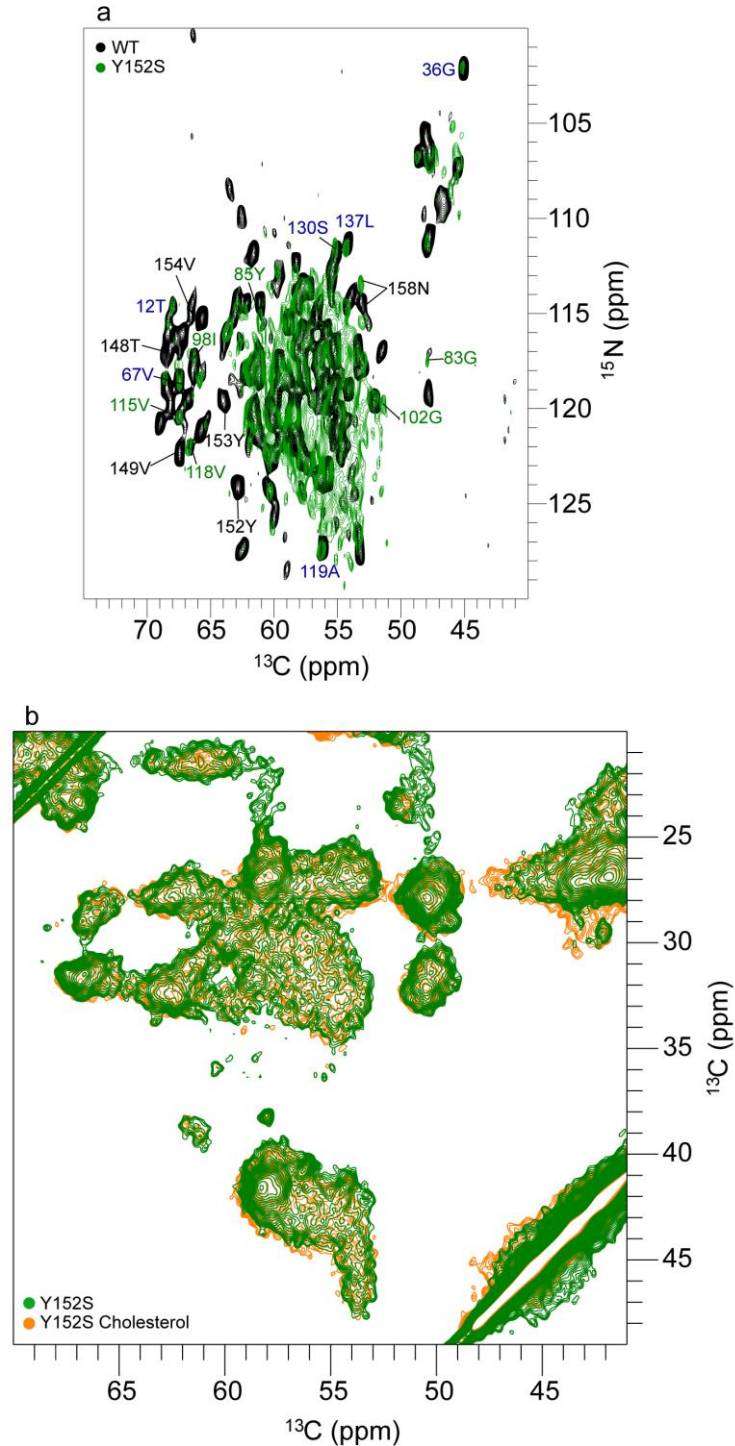

**Supplementary Figure 4 | Solid-state NMR spectra of Y152S-mTSPO (green) reconstituted into DMPC liposomes.** Before reconstitution the protein was loaded with DAA1106 following the same procedure as for the wild-type protein. **(a)** 2D  $^{15}\text{N}$ - $^{13}\text{C}^{\alpha}$  spectrum. The spectrum of wild-type mTSPO in complex with DAA1106 is shown in black for comparison. Cross-peaks are labelled by their residue name: disappearing peaks in black, largely unperturbed peaks in blue and residues, which appear at the monomer chemical shift in Y152S-mTSPO, in green. **(b)** Superposition of a selected region from a  $^{13}\text{C}$ - $^{13}\text{C}$  PDSD spectrum of Y152S-mTSPO (with DAA1106) in the absence (green) and presence (orange) of a 10-fold excess of cholesterol over protein.

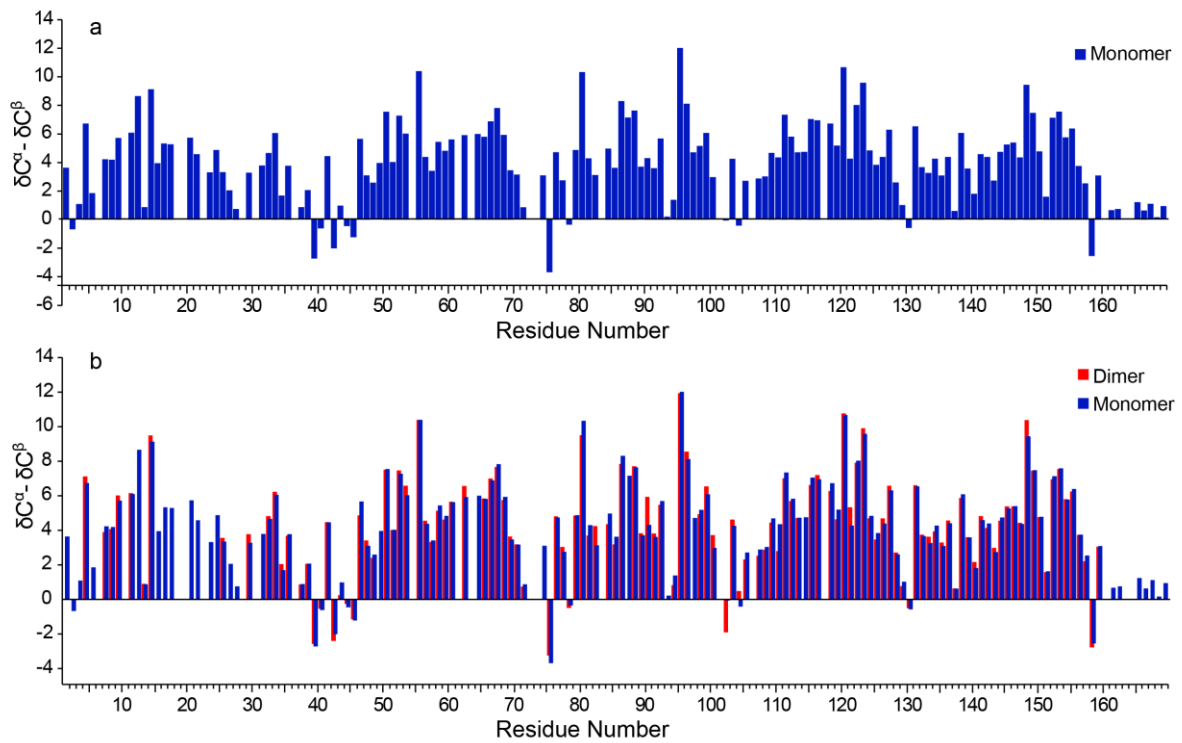

**Supplementary Figure 5 | Secondary structure analysis of membrane-embedded G87V-mTSPO (blue) in complex with DAA1106.** Positive  $\delta C^{\alpha} - \delta C^{\beta}$  values are indicative of  $\alpha$ -helix. Comparison with  $\delta C^{\alpha} - \delta C^{\beta}$  values observed in wild-type mTSPO in complex with DAA1106 (red) demonstrate that the transmembrane helices are intact in both the monomeric and dimeric states of the protein.

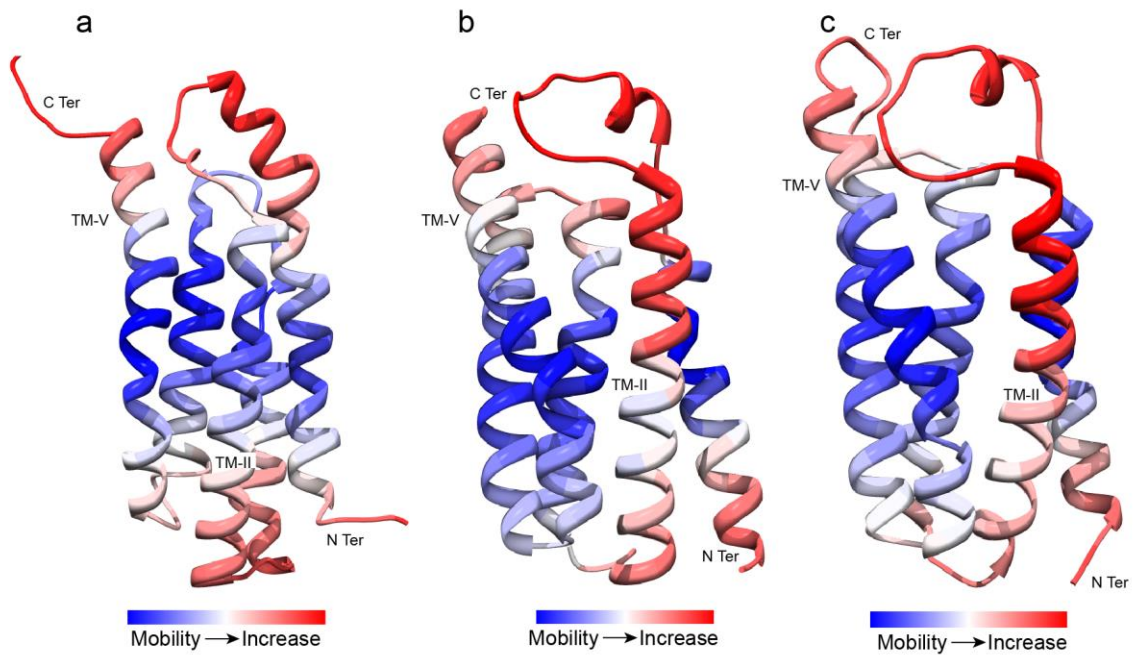

**Supplementary Figure 6 | Gaussian network analysis applied to mTSPO and its bacterial homologues.** (a) mTSPO (PDB id: 2MGY). (b) TspO from *Bacillus cereus* (PDB id: 4RYJ). (c) A138T-TspO from *Rhodobacter sphaeroides* (PDB id: 4UC2). The least stable transmembrane parts of the TSPO fold are the CRAC motif in TM-V and the transmembrane helix TM-II.

**Supplementary Table 1** | Solid-state NMR experiments recorded for  $^{13}\text{C}/^{15}\text{N}$ -labelled mTSPO in complex with DAA1106. The mTSPO:DMPC molar ratio was 1:20.

| Frequency (MHz) | Experiment                                                                                                                       | Acquisition details: Complex points; $t_{\text{max}}$ (ms); SW                                                                    | Scans     | Spinning Speed (kHz) |
|-----------------|----------------------------------------------------------------------------------------------------------------------------------|-----------------------------------------------------------------------------------------------------------------------------------|-----------|----------------------|
| 950             | 2D NCA<br>$^1\text{H}/^{15}\text{N}$ Ramp CP (500 $\mu\text{s}$ )<br>$^{15}\text{N}/^{13}\text{C}$ Tang CP (3800 $\mu\text{s}$ ) | $\omega_1(^{13}\text{C})$ : 1792; 12.5; 299<br>$\omega_2(^{15}\text{N})$ : 80; 12.9; 32                                           | 144       | 19                   |
| 950             | 2D NCO<br>$^1\text{H}/^{15}\text{N}$ Ramp CP (500 $\mu\text{s}$ )<br>$^{15}\text{N}/^{13}\text{C}$ Tang CP (4200 $\mu\text{s}$ ) | $\omega_1(^{13}\text{C})$ : 1792; 12.5; 299<br>$\omega_2(^{15}\text{N})$ : 80; 12.9; 32                                           | 160       | 19                   |
| 950             | 3D NCACB<br>(CA-CB DREAM mixing <sup>1</sup> )                                                                                   | $\omega_1(^{13}\text{C})$ : 1500; 10.5; 299<br>$\omega_2(^{13}\text{C})$ : 72; 5; 30<br>$\omega_3(^{15}\text{N})$ : 36; 5.9; 32   | 96        | 19                   |
| 950             | 2D PDSD<br>$^1\text{H}/^{13}\text{C}$ Ramp CP (500 $\mu\text{s}$ )<br>20 ms mixing                                               | $\omega_1(^{13}\text{C})$ : 1880; 15; 262<br>$\omega_2(^{13}\text{C})$ : 1260; 12; 220                                            | 112       | 11                   |
| 950             | 3D NCACX<br>25 ms PDSD mixing                                                                                                    | $\omega_1(^{13}\text{C})$ : 1792; 12.5; 299<br>$\omega_2(^{13}\text{C})$ : 80; 5.6; 30<br>$\omega_3(^{15}\text{N})$ : 32; 5.2; 32 | 96        | 11                   |
| 950             | 3D NCACX<br>100 ms PDSD mixing                                                                                                   | $\omega_1(^{13}\text{C})$ : 1792; 12.5; 299<br>$\omega_2(^{13}\text{C})$ : 72; 5; 30<br>$\omega_3(^{15}\text{N})$ : 36; 5.9; 32   | 80        | 11                   |
| 950             | 3D NCOCX<br>40 ms DARR mixing <sup>2,3</sup><br>100 ms DARR mixing                                                               | $\omega_1(^{13}\text{C})$ : 1792; 12.5<br>$\omega_2(^{13}\text{C})$ : 40; 5.6<br>$\omega_3(^{15}\text{N})$ : 32; 5.2              | 88<br>104 | 11                   |
| 950             | 3D NCOCA<br>CO-CA BSH transfer <sup>4</sup>                                                                                      | $\omega_1(^{13}\text{C})$ : 1792; 12.5; 299<br>$\omega_2(^{13}\text{C})$ : 36; 5.8; 13<br>$\omega_3(^{15}\text{N})$ : 36; 5.9; 32 | 128       | 19                   |
| 850             | 3D NCACO<br>CA-CO BSH transfer                                                                                                   | $\omega_1(^{13}\text{C})$ : 1200; 12.8; 220<br>$\omega_2(^{13}\text{C})$ : 64; 5; 30<br>$\omega_3(^{15}\text{N})$ : 36; 6.5; 32   | 80        | 20                   |
| 850             | 3D CANCO                                                                                                                         | $\omega_1(^{13}\text{C})$ : 1200; 12.8; 233<br>$\omega_2(^{13}\text{C})$ : 64; 5; 32<br>$\omega_3(^{15}\text{N})$ : 36; 6.5; 32   | 112       | 20                   |

**Supplementary Table 2** | Acquisition parameters of additional NMR experiments recorded for different  $^{13}\text{C}/^{15}\text{N}$ -labelled mTSPO samples.

| Frequency (MHz)                | Experiment                                                                                                                       | Acquisition details: Complex points; $t_{\max}$ (ms); SW                                                                        | Scans | Spinning Speed (kHz) |
|--------------------------------|----------------------------------------------------------------------------------------------------------------------------------|---------------------------------------------------------------------------------------------------------------------------------|-------|----------------------|
| G87V-mTSPO/DAA1106:DMPC (1:20) |                                                                                                                                  |                                                                                                                                 |       |                      |
| 950                            | 2D NCA<br>$^1\text{H}/^{15}\text{N}$ Ramp CP (500 $\mu\text{s}$ )<br>$^{15}\text{N}/^{13}\text{C}$ Tang CP (3800 $\mu\text{s}$ ) | $\omega_1(^{13}\text{C})$ : 1792; 12.5; 299<br>$\omega_2(^{15}\text{N})$ : 80; 12.9; 32                                         | 256   | 19                   |
| 950                            | 2D NCO<br>$^1\text{H}/^{15}\text{N}$ Ramp CP (500 $\mu\text{s}$ )<br>$^{15}\text{N}/^{13}\text{C}$ Tang CP (3400 $\mu\text{s}$ ) | $\omega_1(^{13}\text{C})$ : 1792; 12.5; 299<br>$\omega_2(^{15}\text{N})$ : 80; 12.9; 32                                         | 160   | 19                   |
| 850                            | 3D NCACB<br>(CA-CB DREAM mixing)                                                                                                 | $\omega_1(^{13}\text{C})$ : 1242; 10; 292<br>$\omega_2(^{13}\text{C})$ : 68; 5.3; 30<br>$\omega_3(^{15}\text{N})$ : 30; 5.8; 30 | 88    | 20                   |
| 950                            | 2D PDSO<br>$^1\text{H}/^{13}\text{C}$ Ramp CP (500 $\mu\text{s}$ )<br>20ms mixing                                                | $\omega_1(^{13}\text{C})$ : 1880; 15; 262<br>$\omega_2(^{13}\text{C})$ : 1260; 12; 220                                          | 96    | 11                   |
| mTSPO/DAA1106:DMPC (1:80)      |                                                                                                                                  |                                                                                                                                 |       |                      |
| 950                            | 2D NCA<br>$^1\text{H}/^{15}\text{N}$ Ramp CP (400 $\mu\text{s}$ )<br>$^{15}\text{N}/^{13}\text{C}$ Tang CP (3500 $\mu\text{s}$ ) | $\omega_1(^{13}\text{C})$ : 1792; 12.5; 299<br>$\omega_2(^{15}\text{N})$ : 80; 12.9; 32                                         | 848   | 19                   |
| 950                            | 2D PDSO<br>$^1\text{H}/^{13}\text{C}$ Ramp CP (400 $\mu\text{s}$ )<br>20 ms mixing                                               | $\omega_1(^{13}\text{C})$ : 1880; 15; 262<br>$\omega_2(^{13}\text{C})$ : 1260; 12; 220                                          | 112   | 11                   |
| mTSPO:DMPC (1:50)              |                                                                                                                                  |                                                                                                                                 |       |                      |
| 950                            | 2D NCA<br>$^1\text{H}/^{15}\text{N}$ Ramp CP (400 $\mu\text{s}$ )<br>$^{15}\text{N}/^{13}\text{C}$ Tang CP (4200 $\mu\text{s}$ ) | $\omega_1(^{13}\text{C})$ : 1792; 12.5; 299<br>$\omega_2(^{15}\text{N})$ : 88; 13.4; 34                                         | 320   | 19                   |
| 950                            | 2D NCO<br>$^1\text{H}/^{15}\text{N}$ Ramp CP (400 $\mu\text{s}$ )<br>$^{15}\text{N}/^{13}\text{C}$ Tang CP (4200 $\mu\text{s}$ ) | $\omega_1(^{13}\text{C})$ : 1792; 12.5; 299<br>$\omega_2(^{15}\text{N})$ : 88; 13.4; 34                                         | 320   | 19                   |
| 950                            | 2D PDSO<br>$^1\text{H}/^{13}\text{C}$ Ramp CP (400 $\mu\text{s}$ )<br>20ms mixing                                                | $\omega_1(^{13}\text{C})$ : 1880; 15; 262<br>$\omega_2(^{13}\text{C})$ : 1260; 12; 220                                          | 104   | 11                   |
| mTSPO:DMPC (1:20)              |                                                                                                                                  |                                                                                                                                 |       |                      |
| 800                            | 2D NCA<br>$^1\text{H}/^{15}\text{N}$ Ramp CP (800 $\mu\text{s}$ )<br>$^{15}\text{N}/^{13}\text{C}$ Ramp CP (3000 $\mu\text{s}$ ) | $\omega_1(^{13}\text{C})$ : 1184; 10; 296<br>$\omega_2(^{15}\text{N})$ : 92; 14.2; 40                                           | 304   | 11                   |



|                                                                           |                                                                                                                                     |                                                                                         |         |    |
|---------------------------------------------------------------------------|-------------------------------------------------------------------------------------------------------------------------------------|-----------------------------------------------------------------------------------------|---------|----|
| 800                                                                       | 2D NCO<br>$^1\text{H}/^{15}\text{N}$ Ramp CP (800 $\mu\text{s}$ )<br>$^{15}\text{N}/^{13}\text{C}$ Ramp CP (3800<br>$\mu\text{s}$ ) | $\omega_1(^{13}\text{C})$ : 1660; 14; 296<br>$\omega_2(^{15}\text{N})$ : 84; 14.4; 36   | 300     | 11 |
| 800                                                                       | 2D PDSD<br>$^1\text{H}/^{13}\text{C}$ Ramp CP (600 $\mu\text{s}$ )<br>20 ms mixing                                                  | $\omega_1(^{13}\text{C})$ : 1880; 15; 262<br>$\omega_2(^{13}\text{C})$ : 1260; 12; 220  | 128     | 11 |
| Y152S-mTSPO/DAA1106:DMPC (1:20) / Y152S-mTSPO/DAA1106:DMPC:Chol (1:20:10) |                                                                                                                                     |                                                                                         |         |    |
| 950                                                                       | 2D NCA<br>$^1\text{H}/^{15}\text{N}$ Ramp CP (500 $\mu\text{s}$ )<br>$^{15}\text{N}/^{13}\text{C}$ Tang CP (3800<br>$\mu\text{s}$ ) | $\omega_1(^{13}\text{C})$ : 1792; 12.5; 299<br>$\omega_2(^{15}\text{N})$ : 88; 13.4; 34 | 640/640 | 19 |
| 950                                                                       | 2D NCO<br>$^1\text{H}/^{15}\text{N}$ Ramp CP (500 $\mu\text{s}$ )<br>$^{15}\text{N}/^{13}\text{C}$ Tang CP (4200<br>$\mu\text{s}$ ) | $\omega_1(^{13}\text{C})$ : 1792; 12.5; 299<br>$\omega_2(^{15}\text{N})$ : 88; 13.4; 34 | 384/384 | 19 |
| 950                                                                       | 2D PDSD<br>$^1\text{H}/^{13}\text{C}$ Ramp CP (500 $\mu\text{s}$ )<br>20 ms mixing                                                  | $\omega_1(^{13}\text{C})$ : 1880; 15; 262<br>$\omega_2(^{13}\text{C})$ : 1260; 12; 220  | 96/120  | 11 |
| mTSPO/DAA1106:DMPC:Cholesterol (1:20:10)                                  |                                                                                                                                     |                                                                                         |         |    |
| 950                                                                       | 2D NCA<br>$^1\text{H}/^{15}\text{N}$ Ramp CP (500 $\mu\text{s}$ )<br>$^{15}\text{N}/^{13}\text{C}$ Tang CP (3800<br>$\mu\text{s}$ ) | $\omega_1(^{13}\text{C})$ : 1792; 12.5; 299<br>$\omega_2(^{15}\text{N})$ : 88; 13.4; 34 | 144     | 19 |
| 950                                                                       | 2D NCO<br>$^1\text{H}/^{15}\text{N}$ Ramp CP (500 $\mu\text{s}$ )<br>$^{15}\text{N}/^{13}\text{C}$ Tang CP (4200<br>$\mu\text{s}$ ) | $\omega_1(^{13}\text{C})$ : 1792; 12.5; 299<br>$\omega_2(^{15}\text{N})$ : 88; 13.4; 34 | 160     | 19 |
| 950                                                                       | 2D PDSD<br>$^1\text{H}/^{13}\text{C}$ Ramp CP (500 $\mu\text{s}$ )<br>20 ms mixing                                                  | $\omega_1(^{13}\text{C})$ : 1880; 15; 262<br>$\omega_2(^{13}\text{C})$ : 1260; 12; 220  | 128     | 11 |

## Supplementary methods

**Synthesis of DAA1106.** *N*-(2,5-Dimethoxybenzyl)-*N*-(5-fluoro-2-phenoxyphenyl)acetamide **5** (DAA1106) was prepared according to scheme 1 below<sup>5</sup>. 2,5-Dimethoxybenzyl **7** chloride was synthesized from 2,5-dimethoxybenzyl alcohol<sup>6</sup>.

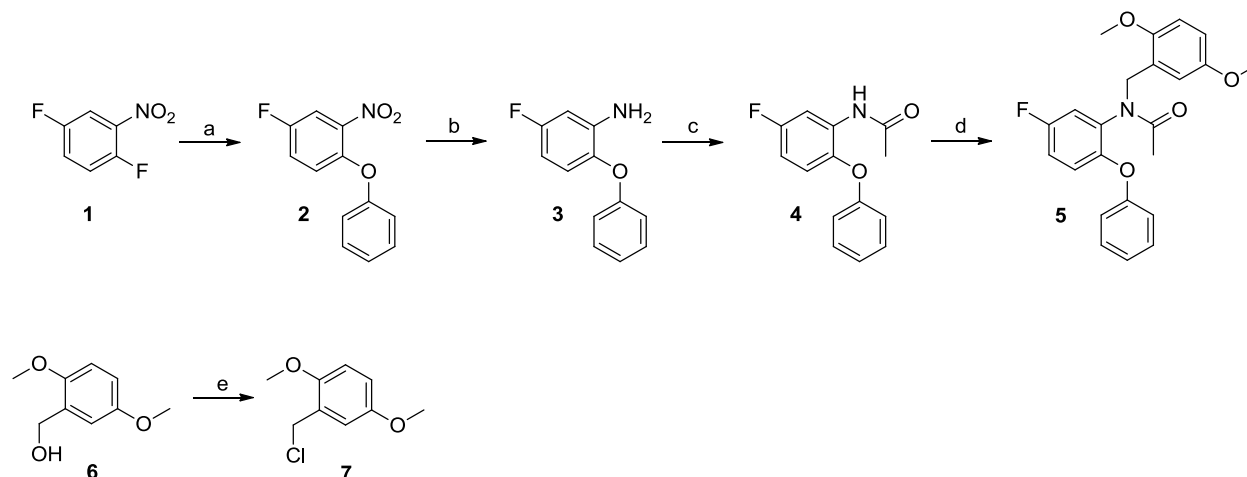

Reagents and conditions: (a) PhOH, K<sub>2</sub>CO<sub>3</sub>, DMF, 75 °C, 3 h, 52%; (b) Fe, AcOH, 100 °C, 30 min, 93%; (c) AcCl, *N*-methylmorpholine, CH<sub>2</sub>Cl<sub>2</sub>, 0-20 °C, 2 h, 97%; (d) 2,5-dimethoxybenzyl chloride, NaH, DMF, 2 h, 81%; (e) HCl conc., 20 min, 80%.

## Supplementary References

1. Verel, R., Ernst, M. & Meier, B.H. Adiabatic dipolar recoupling in solid-state NMR: the DREAM scheme. *J Magn Reson* **150**, 81-99 (2001).
2. Morcombe, C.R., Gaponenko, V., Byrd, R.A. & Zilm, K.W. Diluting abundant spins by isotope edited radio frequency field assisted diffusion. *J Am Chem Soc* **126**, 7196-7 (2004).
3. Takegoshi, K., Nakamura, S. & Terao, T. C-13-H-1 dipolar-assisted rotational resonance in magic-angle spinning NMR. *Chem Phys Lett* **344**, 631-637 (2001).
4. Shi, C. et al. BSH-CP based 3D solid-state NMR experiments for protein resonance assignment. *J Biomol NMR* **59**, 15-22 (2014).
5. Okubo, T., Yoshikawa, R., Chaki, S., Okuyama, S. & Nakazato, A. Design, synthesis and structure-affinity relationships of aryloxyanilide derivatives as novel peripheral benzodiazepine receptor ligands. *Bioorg Med Chem* **12**, 423-38 (2004).
6. Mandell, L., Cooper, S.M., Rubin, B., Campana, C.F. & Day, R.A. Synthesis and electrochemical reduction of [2-(1,4-benzoquinonyl)ethyl]-1,4-benzoquinone. *The Journal of Organic Chemistry* **48**, 3132-3134 (1983).
